# Supplementary material for: Peritumoral EpCAM Is an Independent Prognostic Marker after Curative Resection of HBV-Related Hepatocellular Carcinoma
Source: Hindawi journal article supplement (doi:10.1155/2017/8495326), 2017-01-01

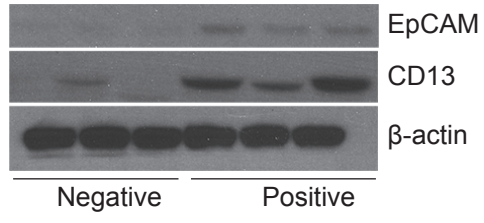

Supplement: f1 [file 8495326.f1.pdf]
