# Supplementary figures and images for: Peritumoral EpCAM Is an Independent Prognostic Marker after Curative Resection of HBV-Related Hepatocellular Carcinoma
Source: Hindawi journal article supplement (doi:10.1155/2017/8495326), 2017-01-01

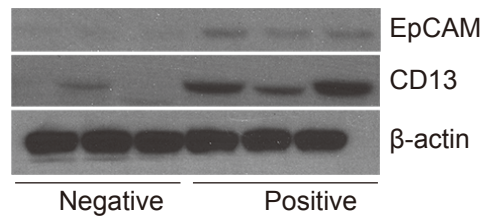

Supplement: f2 [file 8495326.f2.ai]
